# Supplementary material for: Evaluation of a Violence-Prevention Programme with Jamaican Primary School Teachers: A Cluster Randomised Trial
Source: MDPI journal article supplement (doi:10.3390/ijerph16152797), 2019-08-06
Supplement: s1 [file s1]

Supplementary Tables

**Table 1.** Internal reliability and test-retest of questionnaire data.

|                                          | <b>Cronbach's alpha</b> | <b>Test-retest <sup>1</sup> (ICC <sup>2</sup>)</b> |
|------------------------------------------|-------------------------|----------------------------------------------------|
| <i>Teacher wellbeing</i>                 |                         |                                                    |
| Teacher depressive symptoms              | 0.94                    | 0.76                                               |
| Teacher burn-out                         | 0.92                    | 0.86                                               |
| Teacher self-efficacy                    | 0.94                    | 0.81                                               |
| <i>Child behaviour by teacher report</i> |                         |                                                    |
| SDQ child behaviour difficulties         | 0.85                    | 0.80                                               |
| SDQ child prosocial behaviour            | 0.86                    | 0.80                                               |

<sup>1</sup>Over 2 weeks: n=20 for all measures; <sup>2</sup>ICC: intraclass correlation coefficient.

**Table 2.** Test-retest of child school achievement tests.

|                            | <b>Test-retest <sup>1</sup> (ICC <sup>2</sup>)</b> |
|----------------------------|----------------------------------------------------|
| Following directions       | 0.88                                               |
| Story recall               | 0.75                                               |
| Letter-word identification | 0.98                                               |
| Reading comprehension      | 0.98                                               |
| Word attack                | 0.94                                               |
| Spelling of sounds         | 0.98                                               |
| Spelling                   | 0.94                                               |
| Maths calculation          | 0.99                                               |
| Mathematical reasoning     | 0.95                                               |
| Self-regulation            | 0.85                                               |

<sup>1</sup>Over 2 weeks: n=20 for all measures; <sup>2</sup>ICC: intraclass correlation coefficient.

**Table 3.** Factor analysis the measures of teacher well-being at post-test

|                             | <b>Factor 1</b> |
|-----------------------------|-----------------|
| Teacher burn-out            | 0.89            |
| Teacher depressive symptoms | 0.80            |
| Teaching self-efficacy      | -0.73           |
| Variance explained = 65.55% |                 |

**Table 4.** Factor analysis of the school achievement tests at post-test.

|                             | <b>Factor 1</b> | <b>Factor 2</b> |
|-----------------------------|-----------------|-----------------|
| Letter word ID              | 0.94            |                 |
| Spelling                    | 0.92            |                 |
| Reading comprehension       | 0.85            |                 |
| Word attack                 | 0.85            |                 |
| Spelling of sounds          | 0.82            |                 |
| Calculation                 | 0.66            |                 |
| Maths reasoning             | 0.58            | 0.54            |
| Story recall                | 0.44            | 0.44            |
| Self-regulation             |                 | 0.78            |
| Understanding directions    |                 | 0.65            |
| Variance explained = 67.75% |                 |                 |
